1           **The efficiency of Grignard Pure™ to inactivate airborne SARS-CoV-2 surrogate**

2   Grishma Desai<sup>1</sup>, Gurumurthy Ramachandran<sup>2</sup>, Emanuel Goldman<sup>3</sup>, Antony Galione<sup>4</sup>, Altaf Lal<sup>5</sup>,  
3   Toni K. Choueiri<sup>6</sup>, Andre Fay<sup>7</sup>, William Jordan<sup>8</sup>, Donald W. Schaffner<sup>9</sup>, Jack Caravanos<sup>10</sup>,  
4   Etienne Grignard<sup>11</sup> Gediminas Mainelis\*<sup>12</sup>

5   <sup>1</sup> Grignard Company LLC, New Jersey. [grishma.desai@grignard.com](mailto:grishma.desai@grignard.com)

6   <sup>2</sup> Department of Environmental Health and Engineering, Johns Hopkins Education and Research  
7   Center for Occupational Safety and Health, Bloomberg School of Public Health, Whiting School  
8   of Engineering, The Johns Hopkins University. [gramach5@jhu.edu](mailto:gramach5@jhu.edu)

9   <sup>3</sup> Department of Microbiology, Biochemistry and Molecular Genetics, Rutgers-New Jersey  
10   Medical School. [egoldman@njms.rutgers.edu](mailto:egoldman@njms.rutgers.edu)

11   <sup>4</sup> Department of Pharmacology, University of Oxford, UK. [antony.galione@pharm.ox.ac.uk](mailto:antony.galione@pharm.ox.ac.uk)

12   <sup>5</sup> Former Chief, Molecular Vaccine Section, CDC, Former FDA Country Director – India.  
13   [altaf.lal@gmail.com](mailto:altaf.lal@gmail.com)

14   <sup>6</sup> Dana-Farber Cancer Institute, Harvard Medical School. [Toni\\_Choueiri@dfci.harvard.edu](mailto:Toni_Choueiri@dfci.harvard.edu)

15   <sup>7</sup> Pontificia Universidade Católica do Rio Grande do Sul, School of Medicine, Porto Alegre,  
16   Brazil. [andrepfay@gmail.com](mailto:andrepfay@gmail.com)

17   <sup>8</sup> Former Deputy Director, Programs, Office of Pesticide Programs, Environmental Protection  
18   Agency. [jordans4@verizon.net](mailto:jordans4@verizon.net)

19   <sup>9</sup> Department of Food Science, School of Environmental and Biological Sciences, Rutgers, The  
20   State University of NJ. [don.schaffner@rutgers.edu](mailto:don.schaffner@rutgers.edu)

21   <sup>10</sup> Clinical Professor of Environmental Public Health Services, New York University.  
22   [jack@nyu.edu](mailto:jack@nyu.edu)

23   <sup>11</sup> Founder, CEO, Grignard Pure LLC. [etienne@grignardpure.com](mailto:etienne@grignardpure.com)

24   <sup>12</sup> Department of Environmental Sciences, School of Environmental and Biological Sciences,  
25   Rutgers, The State University of NJ. [mainelis@envsci.rutgers.edu](mailto:mainelis@envsci.rutgers.edu)

26

## 27 **Abstract**

28 Grignard Pure™ (GP) is a unique and proprietary blend of Triethylene Glycol (TEG) and inert  
29 ingredients designed for continuous antimicrobial treatment of air. GP received approval from  
30 the US EPA under its Section 18 Public Health Emergency Exemption program for use in seven  
31 states. This study characterizes the efficacy of GP for inactivating MS2 bacteriophage – a non-  
32 enveloped virus widely used as a surrogate for SARs-CoV-2. Experiments measured the  
33 decrease in the airborne viable MS2 concentration in the presence of different concentrations of  
34 GP from 60 to 90 minutes, accounting for both natural die-off and settling of MS2. Experiments  
35 were conducted both by introducing GP aerosol into air containing MS2 and by introducing  
36 airborne MS2 into air containing GP aerosol. GP is consistently able to rapidly reduce viable  
37 MS2 bacteriophage concentration by 2-3 logs at GP concentrations of 0.02 mg/m<sup>3</sup> to 0.5 mg/m<sup>3</sup>  
38 (corresponding to TEG concentrations of 0.012 mg/m<sup>3</sup> to 0.287 mg/m<sup>3</sup>). Related GP efficacy  
39 experiments by the US EPA, as well as GP (TEG) safety and toxicology, are also discussed.

## 40 **Keywords**

41 COVID-19, SARs-CoV-2, Aerosol Transmission, Airborne transmission, Infectious Diseases,  
42 Triethylene Glycol, Aerosol inactivation, MS2 bacteriophage

## 43 **Synopsis**

44 Limited research on the germicidal properties of triethylene glycol against airborne pathogens  
45 was conducted during the 1940s and 50s. This paper investigates the inactivation rate of airborne  
46 bacteriophage MS2 by Grignard Pure™ product, containing a unique and proprietary blend of  
47 Triethylene Glycol (TEG) and inert ingredients.

48

49

50

## 51 **A. Introduction**

52 The COVID-19 pandemic has raised awareness of the airborne transmission of infectious  
53 diseases<sup>1</sup>, including transmission by humans. When infected individuals speak, cough, sneeze, or  
54 sing, they release both large respiratory droplets and smaller airborne microdroplets or aerosol  
55 particles ( $< \sim 5 \mu\text{m}$ )<sup>2</sup>. Large droplets quickly settle on surfaces within 6-10 feet of the source due  
56 to gravity, while smaller aerosol particles (usually  $< 5 \mu\text{m}$ ) can stay afloat for minutes and even  
57 hours, especially if aided by air currents<sup>3</sup>. Laboratory studies have shown the presence of  
58 infectious SARS-CoV-2 in such human-generated microdroplets, and SARS-CoV-2 can remain  
59 viable for up to 16 hours, with a half-life for the viability of 0.5 – 3.3 hours depending on the  
60 size distribution of the respiratory aerosol<sup>4</sup>. Respiratory droplets with a diameter of  $0.09 \mu\text{m}$   
61 containing one virion per droplet may persist for hundreds of hours, whereas  $0.4 \mu\text{m}$  respiratory  
62 droplets containing SARS-CoV-2 virus may remain infectious for only a few hours<sup>4</sup>. Particles  
63 containing the virus have to be either removed from the air or the virus in those particles has to  
64 be inactivated to reduce the risk of exposure to airborne viable viral particles.

65 Many products are available and approved for disinfecting hard and soft surfaces harboring  
66 SARS-CoV-2 (e.g., US EPA's list N<sup>5</sup>). However, there is a clear need for technologies that can  
67 reduce the airborne transmission of the SARS-CoV-2. Among the potential substances to  
68 inactivate airborne biological agents, triethylene glycol (TEG) was demonstrated to have  
69 germicidal properties more than 70 years ago<sup>6</sup>. Aerosolized TEG is almost 100 times more  
70 potent against respiratory pathogens compared to TEG in liquid form<sup>6</sup>. Puck demonstrated in the  
71 1940s that the lethal effect of TEG occurs once a sufficient amount of TEG vapor molecules  
72 condenses on particles containing the microbes<sup>7</sup>. Robertson, et al. (1943) confirmed that TEG  
73 vapor was an effective decontaminant for airborne infectious agents, including viruses causing  
74 influenza, meningopneumonitis, and psittacosis<sup>8</sup>. Bacteria found to be susceptible to TEG vapor  
75 include pneumococci type I, II and III, beta hemolytic streptococci group A and C,  
76 staphylococci, influenza bacilli, *Escherichia coli*, and *Bacillus aerogenes*<sup>6</sup>. As little as 2 – 5  
77  $\text{mg}/\text{m}^3$  of TEG in the air was sufficient to produce “maximum germicidal action” against various  
78 airborne infectious agents<sup>6</sup>.

79 Pure TEG is difficult to safely aerosolize for air treatment purposes due to fire risk<sup>9</sup>. Grignard  
80 Pure™ was developed using TEG as the active ingredient and contains water and propylene  
81 glycol ingredients to aid in faster evaporation while preventing fire hazards<sup>10</sup>. Since the active  
82 ingredient in Grignard Pure™ is TEG, we hypothesized that Grignard Pure™ has the potential to  
83 act as an antimicrobial agent. The goal of this paper is to investigate the efficacy and potential  
84 application of Grignard Pure™ as an airborne antimicrobial agent that can provide a much-  
85 needed additional layer of protection for indoor spaces.

## 86 **B. Materials and Methods**

### 87 **Aerosolization of Grignard Pure™**

88 Grignard Pure™ (GP) includes TEG as the active ingredient and propylene glycol and  
89 deionized water as described in WO 2021/226232<sup>11</sup>. GP was utilized in its undiluted form and  
90 aerosolized through proprietary vaporization or nebulization devices. Vaporizers pass the GP  
91 solution over a heating block, where GP is heated above its boiling point and vaporized. The  
92 vapor released in the target air space (e.g., test chamber) rapidly condenses to form fine droplets  
93 producing a visible aerosol, i.e., haze or fog. Vaporizing dispersion devices can be handheld or  
94 free-standing. The Nimbus handheld vaporizing device (Grignard Pure LLC, Rahway, NJ) was  
95 used in these studies to treat the test chamber with a single, four-second release of GP. Two  
96 stand-alone vaporizing units, the Clarify and the Amhaze (both from Grignard Pure LLC), were  
97 used to treat the chamber air with a controlled time release of GP, where GP is periodically  
98 injected to maintain a set concentration. Nebulizers aerosolize the GP solution and disperse it  
99 through a fine-tipped nozzle. The Aura stand-alone nebulizing device (Grignard Pure, LLC) was  
100 used to treat the chamber air in a controlled time release mode. The target GP aerosol  
101 concentration in a chamber was achieved by adjusting the output volume and the duty cycle of  
102 the employed devices. The resultant GP aerosol concentration was measured as described below  
103 and used to determine the total airborne TEG concentration.

### 104 **Measurement of Triethylene Glycol (TEG) and Grignard Pure™ concentrations in the air**

105 The mass concentration of Grignard Pure™ aerosol was correlated to the total concentration of  
106 TEG in the air (aerosol and vapor). These experiments and the resulting correlation curve are  
107 described in Supporting Information (Figures S1 and S2, and Table S1).

### 108 **Testing of TEG Efficacy Against Airborne Virus**

109 Two different laboratories referred to as Lab 1 and Lab 2 below, performed studies to investigate  
110 TEG aerosol efficacy against airborne MS2 bacteriophage. Experimental setups were slightly  
111 different and are described below. Total TEG concentration in the air was determined based on  
112 GP aerosol concentrations as described in Supporting Information.

### 113 **Aerosol Test Chambers**

114 All testing in Lab 1 was performed in a negative pressure aerosol chamber measuring 3 m (H) x  
115 3 m (W) x 2.4 m (D) made from polycarbonate plastic with a thickness of 0.038m (Figure S3 in  
116 Supporting Information). The chamber, including the walls, glove ports, and sampling ports, was  
117 thoroughly cleaned with 1:100 diluted household bleach solution before initiating the test and  
118 between experiments. On each test day, prior to each experiment, the sampling ports were wiped  
119 with 1:100 household bleach solution.

120 All testing in Lab 2 was conducted in a fully enclosed, 2.7m (H) x 2.7m (W) x 2.1(D) 304  
121 stainless steel sealed chamber equipped with various sampling ports (Figure S4 in Supporting  
122 Information). Following each test, the chamber was evacuated and purged with HEPA-filtered  
123 air for a minimum of 20 mins. The chamber surfaces were wiped with a 50/50 mixture of 95%  
124 isopropyl alcohol as well as DI water. Thirty percent hydrogen peroxide was nebulized into the  
125 chamber for 20 mins between trials.

126

### 127 **Inoculum Preparation and Aerosolization**

128 MS2 bacteriophage (ATCC 15597-B1) and the host microorganism *Escherichia coli* (ATCC  
129 15597) were used in all experiments. MS2 is a small non-enveloped virus and has been used as a  
130 surrogate for the more sensitive enveloped SARS-CoV-2. In addition, MS2 is well characterized  
131 and has frequently been used as a surrogate for other pathogenic viruses (e.g., influenza virus and  
132 SARS-CoV-1) in aerosolization and inactivation studies<sup>12</sup>.

133 Prepared viral stocks in Lab 1 were stored at  $-70^{\circ}\text{C} \pm 10^{\circ}\text{C}$  until ready to be used for testing. On  
134 the day of testing, frozen stocks were removed from the refrigerator and allowed to thaw at room  
135 temperature. Host culture was grown in 10 ml of tryptic soy broth (Hardy Diagnostics, Santa  
136 Maria, CA) at  $36 \pm 1^{\circ}\text{C}$  for 6 - 24 hours. The inoculum was prepared by diluting viral stock in  
137 phosphate buffered saline solution to a target concentration of  $\geq 1.0 \times 10^7$  PFU/ml. Concentration  
138 was determined by performing a standard plate count by enumerating the inoculum prior to  
139 nebulization. MS2 was introduced into the chamber using two Collison 6-jet nebulizers (CH  
140 Technologies, Westwood, NJ) operated at 10 psi pressure. Nebulizers were prepared by adding  
141 15 – 20 ml of inoculum inside a biological safety cabinet (NuAire, Plymouth, MN). A 6-inch  
142 desk clip fan was used to mix the air inside the chamber.

143 Working stock cultures in Lab 2 were prepared using aseptic techniques in a Class 2 biological  
144 safety cabinet (Labconco, Fort Scott, KS), following standard preparation methodologies.  
145 Approximately 250 mL of *E. coli* was prepared in tryptic soy broth and incubated for 24 - 48  
146 hours with oxygen infusion ( $1 \text{ cm}^3/\text{min}$ ) at  $37^{\circ}\text{C}$ . Bacterial stock concentrations were  $\sim 10^9$   
147 CFU/mL as determined through triplicate plating and enumeration. The bacterial suspension was  
148 infected during the logarithmic growth cycle with MS2 bacteriophage. After 18 hours of  
149 incubation, cells were lysed, and the cellular debris discharged by centrifugation. MS2  
150 bacteriophage stock yields were calculated through small drop plaque assay plating and  
151 enumeration and determined to be greater than  $10^{11}$  (PFU/mL) with a single amplification  
152 procedure. The virus was introduced into the chamber through a 24-jet Collison nebulizer (CH  
153 Technologies, Westwood, NJ). The Collison nebulizer was filled with 40ml of inoculum and  
154 operated at 40 psi. This lab used AM520 aerosol photometer (TSI, Inc.) to determine Grignard  
155 Pure™ aerosol mass concentration. This device was calibrated using Arizona Road Dust as  
156 described in Supporting Information.

### 157 **Grignard Pure™ Dispersion Device Preparation**

158 GP was used in its undiluted form in all experiments. Dispersion devices were primed outside the  
159 test chambers for about 5 mins at predetermined operational settings prior to each test

## 160 **Aerosol Efficacy Chamber Runs**

161 Efficacy studies at both labs were conducted at six aerosol concentrations of GP ranging from  
162  $0.02 \text{ mg/m}^3$  to  $0.5 \text{ mg/m}^3$  with corresponding total TEG concentrations of  $0.012 \text{ mg/m}^3$  to  $0.287$   
163  $\text{mg/m}^3$ . Different GP (and corresponding TEG) concentrations were used to investigate whether  
164 the selected concentration range affects the efficacy of GP against MS2.

## 165 **Test Scenarios**

166 Two different contact protocols were used: 1) single shot-burst (4 sec) release of GP into the  
167 MS2 aerosol and 2) a controlled time release of GP to maintain a set GP concentration. Both test  
168 scenarios are illustrated in Figure 1.

169 The sequence of events for the first scenario is shown in Figure 1a. MS2 bacteriophage was  
170 aerosolized for 60 min by Lab 1 or 20 min by Lab 2, and then a sample of airborne MS2 was  
171 collected at  $t = -10$  min to determine the airborne MS2 concentration before the air treatment.  
172 Once this sample was collected, a single, four-second burst of GP was introduced into the  
173 chamber using the Nimbus vaporizing device ( $t=0$  min). The airborne MS2 samples were then  
174 collected at starting time points  $t= 0.5, 15,$  and  $60$  min. Once the last sample was collected, the  
175 test chambers were evacuated/decontaminated. During the control experiments (i.e., no GP was  
176 introduced into the chamber air), samples of airborne MS2 were collected at the same time points  
177 of  $t= -10, 0.5, 15,$  and  $60$  min.

178 In the second scenario, the two labs used slightly different protocols (Figs. 1b and 1c). Lab 1  
179 (Figure 1b) started nebulizing the MS2 phage at  $t = - 70$  min for 60 minutes  $\pm 30$  seconds to  
180 reach the target concentration of the test organism. Then the nebulization stopped, and the  
181 airborne virus was collected for 10 min, from  $t = -10$  min to 0 min. Immediately after the sample  
182 was collected, a controlled time release of GP was initiated, and it lasted from  $t = 0$  until  $t = 70$   
183 min. During this time, three 10-min samples of airborne MS2 were collected with sampling start  
184 times of  $t = 0.5, 15,$  and  $60$  min. At the end of the last sample, the GP aerosolization was  
185 stopped, and the chamber was decontaminated. A series of controlled time release experiments  
186 were performed at Lab 1 at several different airborne TEG concentrations:  $0.063, 0.186, 0.235,$   
187 and  $0.287 \text{ mg/m}^3$ . (The corresponding GP concentrations were  $0.1, 0.32, 0.4,$  and  $0.5 \text{ mg/m}^3$ ).  
188 The experiments with  $0.235 \text{ mg/m}^3$  concentration were performed in triplicate, while

189 experiments with other concentrations were single experiments, adding to the totality of evidence  
190 about the treatment efficacy of GP. Experiments at each GP concentration had their own separate  
191 control experiments. The GP was aerosolized using the Amhaze, a stand-alone vaporizing  
192 device, and it periodically vaporized GP to maintain its concentration in the air. During the  
193 control experiments (i.e., GP was not introduced into the chamber air), samples of airborne MS2  
194 were collected at the same time points of  $t = -10, 0.5, 15, \text{ and } 60$  min.

195 Lab 2's scenario for the controlled time release was different from that of Lab 1 in the initial  
196 phases of the experiments (Figure 1c) to reflect the testing protocol used by the US EPA, which  
197 tested different air treatment technologies, including GP<sup>13</sup>. During these experiments in Lab 2,  
198 GP was released into the air first and continued to be periodically released for the duration of the  
199 experiment to maintain its steady concentration. Twenty minutes after the release of GP was  
200 started, the aerosolization of MS2 was initiated for 20 minutes. After 20 minutes of nebulization,  
201 it was assumed that the MS2 was evenly distributed inside the chamber, and the first 10-min  
202 sample of airborne MS was collected. The sample starting point was marked as time zero. In  
203 order to differentiate time points in these experiments from the time points described above, the  
204 “ $t^*$ ” symbol will be used. The subsequent samples of airborne MS2 were collected at  $t^* = 15, 30,$   
205  $60, \text{ and } 90$  min (again, these time points correspond to the EPA's testing protocol). After the last  
206 sample, GP aerosolization was stopped, and the chamber was evacuated and decontaminated.  
207 These experiments in Lab 2 were performed with the Clarify, a stand-alone vaporizing device,  
208 and the Aura, a stand-alone nebulizing device. For the Clarify, target GP aerosol concentration  
209 was  $0.16 \text{ mg/m}^3$  equating to a total TEG concentration of  $0.092 \text{ mg/m}^3$ . For the Aura, the target  
210 GP aerosol concentration was  $0.04 \text{ mg/m}^3$  equating to a total TEG concentration of  $0.025 \text{ mg/m}^3$ .  
211 During the control experiments (i.e., GP was not introduced into the chamber air), samples of  
212 airborne MS2 were collected at the same time points of  $t^* = 0, 15, 30, 60, \text{ and } 90$  min.

### 213 **Collection of airborne MS2 and analysis procedure**

214 Lab 1 used Biosamplers (SKC Inc., Eighty-Four, PA) operated at  $12.5 \text{ L/min}$  and filled with  $20$   
215 ml of sampling media composed of phosphate buffered saline with  $0.1\%$  Tween 80 to collect air  
216 samples. Spatially distributed triplicate samples were collected for  $10 \text{ minutes} \pm 10 \text{ seconds}$  at  
217 each sampling time point. After sampling, the samplers were moved to a biosafety cabinet for



218 processing. Each sampler's neck was rinsed with 5 ml of sterile phosphate buffered saline and  
219 allowed to drain into the collection cup of the vessel. The liquid was transferred into a sterile 50  
220 ml conical vessel, and the total liquid volume was observed and recorded. Samples were diluted  
221 in a series of ten-fold dilutions in phosphate buffered saline to observe a countable range of  
222 plaques, i.e., 25 – 250 colonies per plate. The dilutions were plated using the pour plate  
223 technique. The dilutions of MS2 samples were plated on 50% tryptic soy agar (TSA), which was  
224 supplemented with 0.100 ml per plate with *E. coli* (ATCC 15597). Plates were swirled and then  
225 allowed to solidify prior to incubation. The plates and controls were incubated at  $36^{\circ}\text{C} \pm 1^{\circ}\text{C}$  for  
226 18 – 24 hrs. The number of plaque forming units (PFU) in each sample was enumerated and  
227 converted to airborne concentration ( $\text{PFU}/\text{m}^3$ ). For dilution series with counts  $< 25$  on the least  
228 diluted plates, counts less than 25 were used in calculations. For dilution series with no counts,  
229 the limit of detection was used to estimate virus concentrations. The limit of detection of the  
230 MS2 for the bioaerosol concentrations was  $80 \text{ PFU}/\text{m}^3$

231 In Lab 2, two AGI-30 impingers (Ace Glass Inc., Vineland, NJ) located at opposite corners of  
232 the chamber were used to collect air samples at their nominal flow rate of 12.5 L/min. The  
233 impingers contained 20 ml of sampling media composed of sterilized phosphate buffered saline  
234 with 0.005% v/v Tween 80. Aliquots of impinger samples were plated in triplicate on tryptic soy  
235 agar media using the small drop plaque assay technique over a minimum 3-log dilution range.  
236 The samples were diluted in the phosphate buffered saline solution using a 1:99 dilution of  
237 overnight MS2 bacteriophage plating stock *E. coli* (ATCC #15597). Plates were incubated for  
238 24-48 hours, and the resulting PFUs were counted and converted to  $\text{PFU}/\text{m}^3$ . The limit of  
239 detection of the MS2 for the bioaerosol concentrations was  $1000 \text{ PFU}/\text{m}^3$

#### 240 **Calculation of Grignard Pure™ treatment efficacy**

241 In control experiments (i.e., without Grignard Pure™ present in the air), the concentration of  
242 viable airborne MS2 bacteriophage decreases due to natural die-off and settling (NDOS); when  
243 the air is treated by Grignard Pure™, the MS2 loses viability due to natural die-off and settling  
244 and the inactivating action of Grignard Pure™. To determine the base-10 log reduction (Lg) in  
245 MS2 viability caused by Grignard Pure™ ( $LR_{GP}$ ), the log reduction in MS2 viability during  
246 control experiments ( $LR_{NDOS}$ ) must be subtracted from the log reduction during treatment

247 experiments ( $LR_{NDOS+GP}$ ). Since the virus titers in Lab 1 during the control and treatment  
248 experiments were different,  $LR_{NDOS}$  and  $LR_{NDOS+GP}$  were first calculated separately relative to the  
249 sample collected starting at  $t = -10$  min and then used to determine ( $LR_{GP}$ ) for each sampling  
250 time  $x$ , as follows:

$$251 \quad LR_{GP} = LR_{NDOS+GP} - LR_{NDOS} = Lg\left(\frac{C_{GP}(t=x)}{C_{GP}(t=-10)}\right) - Lg\left(\frac{C_{control}(t=x)}{C_{control}(t=-10)}\right), \quad (1)$$

252 where  $C_{control}$  is airborne viable virus concentration during control experiments (i.e., air not treated  
253 by GP), and  $C_{GP}$  is the airborne virus concentration when the air was treated by GP.  $LR_{NDOS+GP}$   
254 could also be called gross log reduction, while  $LR_{GP}$  is net of effective  $\log_{10}$  reduction.

255 In Lab 2, the virus titers during the control and treatment experiments were the same, and Eq. 1  
256 could be simplified to the following equation for each sampling time point  $x$ :

$$257 \quad LR_{GP} = LR_{NDOS+GP} - LR_{NDOS} = Lg\left(\frac{C_{GP}(t=x)}{C_{control}(t=x)}\right) \quad (2)$$

258 Each  $LR$  for each time point can be easily converted into percent reduction ( $PR$ ):

$$259 \quad PR = (1 - 10^{-LR}) \times 100\% \quad (3)$$

## 260 **C. Results and Discussion**

### 261 **Efficacy of a four-second burst of TEG against the airborne virus**

262 The concentrations of viable airborne MS2 bacteriophage and its reduction over time  
263 when treated with a single four-second burst of GP at Lab 1 and Lab 2 and the resulting  
264 net log reduction are shown in Table S2 in Supporting Information and Figure 2,  
265 respectively.

266 Viable MS2 concentration decreased by 0.15 log (30%) at 0.5 min, and the decrease  
267 reached over 1 log (90%) at a sampling time of 60 min in all experiments due to natural  
268 die-off and settling. The gross inactivation was 3 (99.9 %) logs at 0.5 min and 4 logs  
269 (99.99%) at 15 and 60 min. This yielded the net log reduction of 2.6 in the aerosol  
270 concentration of MS2 bacteriophage when sampled at  $t=0.5$  min after treatment by GP.

271 At the  $t=15$  min sample, Lab 1 observed a net log reduction of 2.89 in MS2 viable  
272 concentration, while the net log reduction value reported by Lab 2 was 3.18. After 60  
273 min of treatment, both labs recorded slightly lower net reduction values compared to  $t=$   
274 15 min: 2.44 by Lab 1 and  $\sim 3$  by Lab 2.

275 Data from both labs are in good agreement, which is important because the two labs  
276 used slightly different virus preparation protocols and different initial viable virus  
277 concentrations. Lab 1 started experiments with  $3.4 \times 10^8$  PFU/m<sup>3</sup>, while Lab 2 started  
278 with almost two orders higher virus concentrations,  $6.7 \times 10^{10}$  PFU/m<sup>3</sup>. When the data  
279 from the two labs are averaged, the net log reduction at  $t=0.5$  min is 2.6, and at  $t=15$   
280 min, the net reduction is 3, i.e., 99.9% of the viable virus was eliminated. In addition,  
281 the log reduction in MS2 concentration with GP treatment is statistically significantly  
282 different ( $p<0.05$ ) from the log reduction in MS2 due to natural die-off and settling for  
283 all three time points, according to a paired t-test. The observed reduced inactivation at  $t=$   
284 60 min is due to the limit of detection issues, i.e., too few viable viruses remained in the  
285 air after the treatment.

## 286 **Efficacy of controlled time release of Grignard Pure™ against airborne virus particles**

287 The log reductions in airborne viable MS2 bacteriophage concentration during control  
288 and treatment experiments at different sampling time points are presented in Figure 3,  
289 while the concentration values are given in Table S3 in Supporting Information. The  
290 results show that GP is highly effective and yields 1-2.5 net log reduction in MS2  
291 concentration in samples that were initiated just 30 s post-treatment (Fig. 3c). In samples  
292 that were collected starting 15 min after the treatment, the net log reduction ranged from  
293 2 at the lowest tested TEG concentration of 0.063 mg/m<sup>3</sup> to 3.1 at the highest tested  
294 TEG concentration of 0.287 mg/m<sup>3</sup>. In general, for 0.5-minute and 15-minute sampling  
295 times, the inactivation seemed to increase somewhat with increasing TEG concentration.  
296 At 60 min sampling time, compared to the previous sampling times, the net log  
297 reduction either stayed the same (TEG = 0.063 mg/m<sup>3</sup>), increased (TEG = 0.186 and  
298 0.235 mg/m<sup>3</sup>) or slightly decreased (TEG = 0.287 mg/m<sup>3</sup>). The steady or decreasing  
299 inactivation at the 60 min sampling point compared to 0.5- and 15-minute sampling

300 points could be attributed to viable virus concentration approaching the limit of  
301 detection of the sampling and analytical method. When data from all experiments are  
302 pooled together, regardless of the GP concentration, the observed log reduction in viable  
303 MS2 concentration with GP treatment is statistically significantly different ( $p < 0.01$ )  
304 from the log reduction in airborne MS2 concentration due to natural die-off and settling  
305 for all three time points, according to a paired t-test.

306 The log reductions in airborne viable MS2 bacteriophage concentration during control  
307 and treatment experiments are presented in Figure 4. The observed concentrations of  
308 viable airborne MS2 bacteriophage are in Table S4 in Supporting Information. A gross  
309 log reduction of 2.57 in viable MS2 concentration can be seen at time zero when the GP  
310 was released using the Clearify device according to the schematic in Figure 1c; both  
311 devices yielded a 1.60 net log reduction. At the 15 min sampling time, the net log  
312 reduction increased to 3.2 with Clearify and 2.5 for Aura. As time progressed, the net  
313 log inactivation of MS2 steadily increased to approximately 3.3 when the Aura device  
314 was used. For the treatment using the Clearify device, the net log reduction remained  
315 steady above 3 due to the low remaining viable virus concentration in the air.

### 316 **Comparison with testing by the US EPA**

317 In addition to the testing conducted by Grignard Pure LLC at Lab 1 and Lab 2, GP was also  
318 evaluated by the US EPA's Office of Research and Development in May – June 2021 as part of  
319 their COVID-19 Research<sup>14</sup>. The main objective of the EPA's research was to evaluate the  
320 efficacy of different types of aerosol treatment technologies in reducing airborne virus  
321 concentrations using a large-scale test chamber and a standardized testing approach<sup>14</sup>.

322 The effectiveness of GP against the MS2 bacteriophage was evaluated by the EPA in two test  
323 scenarios. In the first, the MS2 bacteriophage was first introduced into the chamber as an aerosol,  
324 the initial bioaerosol sample was taken to determine the virus concentration at time = 0 min, and  
325 then GP was added to the chamber, similar to the test scenario in Lab 1 as shown in Figure 1b<sup>13</sup>.  
326 This allowed for a direct assessment of the efficacy of inactivation of GP at a high concentration  
327 of the MS2 bacteriophage in the chamber air as a function of time since the product  
328 introduction<sup>13</sup>. In the second scenario, the GP was first added to the chamber environment at the

329 desired concentration before the MS2 bacteriophage was aerosolized in the chamber, similar to  
330 the test scenario in Lab 2, as shown in Figure 1c<sup>13</sup>. This scenario more directly assessed the  
331 continued use of GP in occupied spaces, where virus could be introduced by an infected  
332 individual(s) into a space where the target concentration of GP is maintained<sup>13</sup>. The materials  
333 and methodology employed by the US EPA are available on the official US EPA COVID-19  
334 Research webpage<sup>13</sup>.

335 With the first test scenario, at the sampling time of 15 min, the percentage reduction observed at  
336 the US EPA was 95.5% and 99.76% (1.3 and 2.6 logs)<sup>13</sup>, similar to results from Lab 1. With both  
337 tests, there was an increased percentage reduction of MS2 bacteriophage as time passed. At 60  
338 minutes, the testing at the US EPA achieved a 97.6% (1.6 logs) reduction, and the testing at Lab  
339 1 achieved a 99.8% (2.7 logs) reduction. These results further confirm GP's ability to achieve at  
340 least 1.0 – 2.5 log reduction at the first sampling time. The difference in results may be attributed  
341 to the size of the chamber, inoculum preparation, and aerosol sample collection method. Data for  
342 the second test scenario showed a similar trend in reducing viable MS2 bacteriophage  
343 concentration at both the US EPA and Lab 2. At time zero, a 99.5% (2.3 logs) reduction was  
344 seen at the US EPA<sup>13</sup>, whereas Lab 2 reported a 99.72% (2.5 logs) and 97.77% (1.65 logs)  
345 reduction with the Clarify and the Aura devices, respectively. At the 15-minute sampling time,  
346 a 99.4% reduction (2.22 log) was reported at the US EPA, and a 99.9% (3 logs) reduction was  
347 reported for both the Clarify and the Aura devices tested at Lab 2.

348 Thus, testing conducted at Lab 1, Lab 2, and at the US EPA's Office of Research and  
349 Development has consistently shown that GP can achieve up to a 3-log reduction in the  
350 concentration of airborne viable of the MS2 bacteriophage within 60 min of treatment and, in  
351 some cases, within 15 min of treatment.

352 Most of the conducted experiments are single experiments (i.e., each condition was not  
353 repeated by each lab). However, two separate laboratories conducted similar tests, and  
354 the results from their testing were consistent with each other as well as with the testing  
355 conducted by the US EPA. The totality of the evidence from the three sets of  
356 experiments indicates general agreement about the efficacy of GP against airborne  
357 viruses such as MS2 bacteriophage, which is often used as a surrogate for SARS-Cov-2.

## 358 **Toxicity of TEG - active ingredient of Grignard Pure**

359 US EPA has concluded that TEG is of very low toxicity by the oral, dermal, and inhalation  
360 routes of exposure based on a review of available toxicology data<sup>15</sup>. The toxicology database is  
361 adequate to characterize the hazard of TEG, and no data gaps have been identified<sup>15</sup>. Further, the  
362 US EPA has not identified toxicological endpoints of concern for the active and inert uses of  
363 triethylene glycol. The US EPA has no risk concerns for TEG with respect to human exposure<sup>15</sup>.  
364 US EPA has also granted an exemption from the requirement of a tolerance for residues of  
365 antimicrobial pesticide ingredients for TEG (85 FR 69514) when used on or applied to food-  
366 contact surfaces in public places, including processing equipment<sup>16</sup>. TEG has also received  
367 “Generally Recognized As Safe” status for use as a food additive by the US FDA<sup>17</sup>.

368 TEG has been studied for repeat inhalation exposure effects in both rats and monkeys varying in  
369 duration from nine days to 13 months. In a nose-only exposure study, Sprague-Dawley rats were  
370 exposed to mean exposure concentrations of 102, 512, or 1036 mg/m<sup>3</sup> of TEG for 6 hours a day  
371 for 9 consecutive days. In this study, no systemic adverse effects were seen at any level of  
372 exposure<sup>18</sup>. The investigators also concluded that “exposure to a respiratory aerosol is not acutely  
373 harmful, but may cause sensory irritant effects”<sup>18</sup>. Robertson et al (1947) conducted 3 different  
374 exposure studies with Monkeys. Browning of facial skin and crusting and damage to the skin of  
375 the ears occurred in 13 monkeys continuously exposed for 3 months or longer to an atmosphere  
376 containing about 4 mg TEG/m<sup>3</sup> and described as ‘supersaturated.’ It was suggested that the  
377 bactericidal action of TEG may have promoted a parasitic infection which caused the skin  
378 damage<sup>18</sup>. Thirteen monkeys exposed continuously for 13 months to an atmosphere  
379 ‘supersaturated’ with TEG vapor (a concentration of 4 mg/m<sup>3</sup>) had slightly reduced weights<sup>18</sup>. In  
380 a subsequent study, eight monkeys exposed to 2 – 3 mg/m<sup>3</sup> for 10 months did not suffer skin  
381 effects, and no adverse effects were observed upon growth.

382 According to the European Chemicals Agency’s Classification and Labelling Inventory  
383 Database, TEG has not been classified as a human health hazard by the majority of the industry  
384 notifiers<sup>19</sup>.

385 Nelson Laboratories, LLC (Salt Lake City, UT) developed a “Margin of Safety” (MOS)  
386 document for airborne TEG exposures based on Grignard Pure™ use levels for adult, child,  
387 infant, and neonatal populations utilizing the Tolerable Exposure limit (TE). Using standard

388 toxicological exposure parameters such as tolerable intake, tolerable exposure, and published  
389 breathing rates and body weights for the various groups, MOS values were reported. By  
390 considering the maximum (worst-case) exposure to TEG ( $\sim 1.0 \text{ mg/m}^3$ ) from the use of the  
391 aerosolized GP product and the ISO 18562 default breathing rates for adults ( $20 \text{ m}^3/\text{day}$ ),  
392 pediatrics ( $5 \text{ m}^3/\text{day}$ ), infants ( $2 \text{ m}^3/\text{day}$ ), and neonates ( $0.2 \text{ m}^3/\text{day}$ ), MOS was calculated by  
393 dividing the TE by the worst exposure amount<sup>17</sup>. The margin of safety for TEG under a worse-  
394 case exposure situation ranged from 2.0 for pediatric exposures to an average of 3.2 for adult  
395 men and women. For reference, an MOS value greater than 1 indicates a low toxicological  
396 hazard<sup>17</sup>. The report concludes that given these favorable MOS values, “acute, subacute/sub-  
397 chronic, and chronic toxicity, genotoxicity, and carcinogenicity from the exposure to TEG from  
398 the intended use of the product are not expected”<sup>17</sup>.

399  
400 Another independent review of the safety TEG by TSG Consulting (Washington, DC) further  
401 concluded that the concentrations of airborne TEG from the use of the GP products ( $\leq 1.5$   
402  $\text{mg/m}^3$ ) are more than 100 times less than the human equivalent concentration ( $\sim 200 \text{ mg/m}^3$ )  
403 of the established limit dose for TEG in repeat-exposure animal inhalation toxicity studies  
404 ( $1,000 \text{ mg/m}^3$ )<sup>20</sup>.

405  
406 In addition, the active ingredient of Grignard Pure™ - TEG has been utilized in lighting effects  
407 products that have been widely used for over two decades in theatrical, film, and TV  
408 productions, as well as at live events like concerts, sports, and worship services. The lighting  
409 effects product, which is used in a manner similar to GP, has exposed millions of people to  
410 concentrations of TEG between  $5 - 10 \text{ mg/m}^3$ , often even at higher levels, and there have been  
411 no reported health issues associated with these exposures.

412 In summary, the results presented above by this study, as well as testing by the US EPA, show  
413 that the Grignard Pure™ (GP) product is able to inactivate over 99% of airborne virus particles  
414 within one minute of their introduction into an indoor space containing the product, and the  
415 inactivation reaches 2-3 logs within 60 minutes. In addition, there is a large body of scientific  
416 research indicating that the TEG levels at which GP is effective, e.g.,  $0.3 \text{ mg/m}^3$  to  $0.5 \text{ mg/m}^3$  of  
417 GP, pose negligible health risks to humans.

418 The SARS-CoV-2 virus continues to mutate, and the newer emerging variants have  
419 proven to be more transmissible than earlier ones. As a result, despite vaccines,  
420 masking, and social distancing measures, the numbers of COVID-19 cases in the United  
421 States and globally have risen rapidly to levels higher than previously seen during the  
422 pandemic, putting immune-compromised and unvaccinated individuals at high risks of  
423 serious illness. A recent study by Lai et al. (2022) indicated that infected persons shed  
424 infectious SARS-CoV-2 aerosols even when fully vaccinated and boosted<sup>21</sup>. The  
425 evolutionary selection appears to have favored SARS-CoV-2 variants associated with  
426 higher viral aerosol shedding, requiring non-pharmaceutical interventions, especially  
427 indoor air hygiene (e.g., ventilation, filtration, and air disinfection) to mitigate COVID-  
428 19 transmission in vaccinated communities<sup>21</sup>. To minimize exposure to the virus and  
429 decrease the incidence of COVID-19 cases, it is critical to develop and utilize additional  
430 layers of protection.

431 One such layer could be the application of technological solutions to continuously  
432 inactivate the virus that is present or has been introduced into indoor space by infected  
433 individuals. Aerosolized TEG could be an important additional tool for lowering  
434 exposures to the SARS-CoV-2 virus in occupied and unoccupied indoor spaces.  
435 Compared to enhanced filtration and ventilation measures, GP provides a faster-acting  
436 mechanism to reduce airborne concentrations of the virus, as demonstrated by the testing  
437 described in this paper. Air change rates in typical occupied spaces range from 2-4 air  
438 changes per hour, resulting in a period of 90-180 min to complete 6 changes of room air.  
439 GP has been tested to provide a 99.5% reduction in airborne virus concentrations in a  
440 period of less than 10 min, accomplishing a 99% reduction in airborne concentrations 9  
441 to 18 times faster than central ventilation, HEPA filtration, or UV treatment alone<sup>22</sup>.  
442 Therefore, it can be used as a continuous anti-virus air treatment either by itself or in  
443 conjunction with enhanced ventilation and air filtration measures. Maintaining a preset  
444 level of GP in the air of an indoor space would provide continuous protection to its  
445 occupants by inactivating a very high percentage of virus particles within minutes as  
446 they are newly introduced into the space. It could prove useful in spaces such as movie  
447 theaters, public transit vehicles, hotel rooms, offices, and other public spaces. Moreover,  
448 as an engineering control, everyone present in spaces where the product is used would



449 receive its benefits, in contrast to vaccination, masking, and social distancing, all of  
450 which depend on individual choices for their success. Further testing of GP might even  
451 demonstrate its efficacy against other airborne pathogens such as the influenza virus.

452 The TEG-based antimicrobial air treatment product tested here shows high efficacy of  
453 viral inactivation and a favorable safety profile. As a result, it can be used to reduce  
454 exposure to the SARS-CoV-2 virus in indoor public spaces.

455

## 456 **Acknowledgments**

457 We would like to extend our thanks to the support of Steve Winston and the Crisis Science  
458 Collaboration Group.

459

## 460 **Funding Sources**

461 Some of the research described in this article was funded by Grignard Pure, LLC, the  
462 company that makes Grignard Pure™

463

## 464 **Bibliography**

- 465 (1) Islam, M. S.; Rahman, K. M.; Sun, Y.; Qureshi, M. O.; Abdi, I.; Chughtai, A. A.; Seale,  
466 H. Current Knowledge of COVID-19 and Infection Prevention and Control Strategies in  
467 Healthcare Settings: A Global Analysis. *Infect. Control Hosp. Epidemiol.* **2020**, 1–11.  
468 <https://doi.org/10.1017/ice.2020.237>.
- 469 (2) Chia, P. Y.; Coleman, K. K.; Tan, Y. K.; Ong, S. W. X.; Gum, M.; Lau, S. K.; Lim, X. F.;  
470 Lim, A. S.; Sutjipto, S.; Lee, P. H.; Son, T. T.; Young, B. E.; Milton, D. K.; Gray, G. C.;  
471 Schuster, S.; Barkham, T.; De, P. P.; Vasoo, S.; Chan, M.; Ang, B. S. P.; Tan, B. H.; Leo,  
472 Y.-S.; Ng, O.-T.; Wong, M. S. Y.; Marimuthu, K.; Singapore 2019 Novel Coronavirus  
473 Outbreak Research Team. Detection of Air and Surface Contamination by SARS-CoV-2  
474 in Hospital Rooms of Infected Patients. *Nat. Commun.* **2020**, *11* (1), 2800.  
475 <https://doi.org/10.1038/s41467-020-16670-2>.

- 476 (3) Zuo, Y. Y.; Uspal, W. E.; Wei, T. Airborne Transmission of COVID-19: Aerosol  
477 Dispersion, Lung Deposition, and Virus-Receptor Interactions. *ACS Nano* **2020**,  
478 *acs.nano.0c08484*. <https://doi.org/10.1021/acsnano.0c08484>.
- 479 (4) Bazant, M. Z.; Bush, J. W. M. A Guideline to Limit Indoor Airborne Transmission of  
480 COVID-19. *Proc. Natl. Acad. Sci.* **2021**, *118* (17), e2018995118.  
481 <https://doi.org/10.1073/pnas.2018995118>.
- 482 (5) EPA. *Disinfectants Pesticides*. <https://cfpub.epa.gov/wizards/disinfectants/> (accessed  
483 2022-07-11).
- 484 (6) Lester, W.; Kaye, S.; Robertson, O. H.; Dunklin, E. W. Factors of Importance in the Use  
485 of Triethylene Glycol Vapor for Aerial Disinfection. *Am. J. Public Health Nations Health*  
486 **1950**, *40* (7), 813–820. <https://doi.org/10.2105/AJPH.40.7.813>.
- 487 (7) Puck, T. T. The Mechanism of Aerial Disinfection by Glycols and Other Chemical  
488 Agents. *J. Exp. Med.* **1947**, *85* (6), 729–739.
- 489 (8) Robertson, O. H.; Puck, T. T.; Lemon, H. F.; Loosli, C. G. The Lethal Effect of  
490 Triethylene Glycol Vapor on Air-Borne Bacteria and Influenza Virus. *Science* **1943**, *97*  
491 (2510), 142–144.
- 492 (9) *Triethylene Glycol*. <https://cameochemicals.noaa.gov/chemical/9148> (accessed 2022-08-  
493 16).
- 494 (10) John Wintermute. Physical and Chemical Properties of Grignard Pure, 2020.
- 495 (11) Grignard III, E. E. *Aerial Disinfection*.  
496 [https://patentscope2.wipo.int/search/en/detail.jsf?docId=WO2021226232&\\_cid=JP2-  
497 KZRJGQ-23931-1](https://patentscope2.wipo.int/search/en/detail.jsf?docId=WO2021226232&_cid=JP2-KZRJGQ-23931-1) (accessed 2022-08-17).
- 498 (12) Dietrich, W. L.; Bennett, J. S.; Jones, B. W.; Hosni, M. H. Laboratory Modeling of SARS-  
499 CoV-2 Exposure Reduction Through Physically Distanced Seating in Aircraft Cabins  
500 Using Bacteriophage Aerosol — November 2020. *MMWR Morb. Mortal. Wkly. Rep.*  
501 **2021**, *70* (16), 595–599. <https://doi.org/10.15585/mmwr.mm7016e1>.
- 502 (13) US EPA, O. *Results for Aerosol Treatment Technology Evaluation with Grignard Pure*.  
503 [https://www.epa.gov/covid19-research/results-aerosol-treatment-technology-evaluation-  
504 grignard-pure](https://www.epa.gov/covid19-research/results-aerosol-treatment-technology-evaluation-grignard-pure) (accessed 2022-07-11).
- 505 (14) US EPA, O. *Aerosol Treatment Technology Evaluation*. [https://www.epa.gov/covid19-  
506 research/aerosol-treatment-technology-evaluation](https://www.epa.gov/covid19-research/aerosol-treatment-technology-evaluation) (accessed 2022-07-15).
- 507 (15) Frank T Sandars. Reregistration Eligibility Decision (RED) for Triethylene Glycol, **2005**.
- 508 (16) US EPA. *Dipropylene Glycol and Triethylene Glycol; Exemption From the Requirement*  
509 *of a Tolerance*. Federal Register.  
510 [https://www.federalregister.gov/documents/2020/11/03/2020-23199/dipropylene-glycol-  
511 and-triethylene-glycol-exemption-from-the-requirement-of-a-tolerance](https://www.federalregister.gov/documents/2020/11/03/2020-23199/dipropylene-glycol-and-triethylene-glycol-exemption-from-the-requirement-of-a-tolerance) (accessed 2022-07-  
512 15).
- 513 (17) Sarah Campbell. *Tolerable Exposure Derivation for Triethylene Glycol by Inhalation*  
514 *Route and Risk Assessment for Use of Grignard Pure, an antimicrobial air treatment*  
515 *product*. [https://grignardpure.com/wp-content/uploads/2022/08/Grignard-Pure\\_Nelson-  
516 Toxicity-Memo\\_Aerosol\\_061522.pdf](https://grignardpure.com/wp-content/uploads/2022/08/Grignard-Pure_Nelson-Toxicity-Memo_Aerosol_061522.pdf).
- 517 (18) Kaiser. Provisional Peer-Reviewed Toxicity Values for Triethylene Glycol (CASRN 112-  
518 27-6). **2014**, 53.
- 519 (19) Lambert, C. *Toxicological Risk Assessment of Grignard Pure*.  
520 <https://grignardpure.com/grignard-pure-safety-and-health-data/>.

- 521 (20) TSG. *Inhalation Exposure to Triethylene Glycol (TEG) in Grignard Pure products*.  
522 [https://grignardpure.com/wp-content/uploads/2022/08/TSG-Grignard-Pure-](https://grignardpure.com/wp-content/uploads/2022/08/TSG-Grignard-Pure-Memorandum_071.22.pdf)  
523 [Memorandum\\_071.22.pdf](https://grignardpure.com/wp-content/uploads/2022/08/TSG-Grignard-Pure-Memorandum_071.22.pdf).
- 524 (21) Lai, J.; Coleman, K. K.; Sheldon Tai, S.-H.; German, J.; Hong, F.; Albert, B.; Esparza, Y.;  
525 Srikakulapu, A. K.; Schanz, M.; Maldonado, I. S.; Oertel, M.; Fadul, N.; Gold, T. L.;  
526 Weston, S.; Mullins, K.; McPhaul, K. M.; Frieman, M.; Milton, D. K. *Evolution of SARS-*  
527 *CoV-2 Shedding in Exhaled Breath Aerosols*; preprint; Infectious Diseases (except  
528 HIV/AIDS), **2022**. <https://doi.org/10.1101/2022.07.27.22278121>.
- 529 (22) William Jordan; Mitchel Simpler; Ed Bosco; Chris Holliday; Dr. Gurumurthy  
530 Ramachandran. *A Comparison of the Grignard Pure Antimicrobial Air Treatment*  
531 *Technology with Enhanced Ventilation and Filtration Strategies for Reducing the Levels*  
532 *of Airborne SARS-CoV-2 virus particles*. [https://grignardpure.com/wp-](https://grignardpure.com/wp-content/uploads/2021/12/Ventilation-Filtration-Challenges-To-Consider-and-Grignard-Pure-_11102113.pdf)  
533 [content/uploads/2021/12/Ventilation-Filtration-Challenges-To-Consider-and-Grignard-](https://grignardpure.com/wp-content/uploads/2021/12/Ventilation-Filtration-Challenges-To-Consider-and-Grignard-Pure-_11102113.pdf)  
534 [Pure-\\_11102113.pdf](https://grignardpure.com/wp-content/uploads/2021/12/Ventilation-Filtration-Challenges-To-Consider-and-Grignard-Pure-_11102113.pdf).  
535

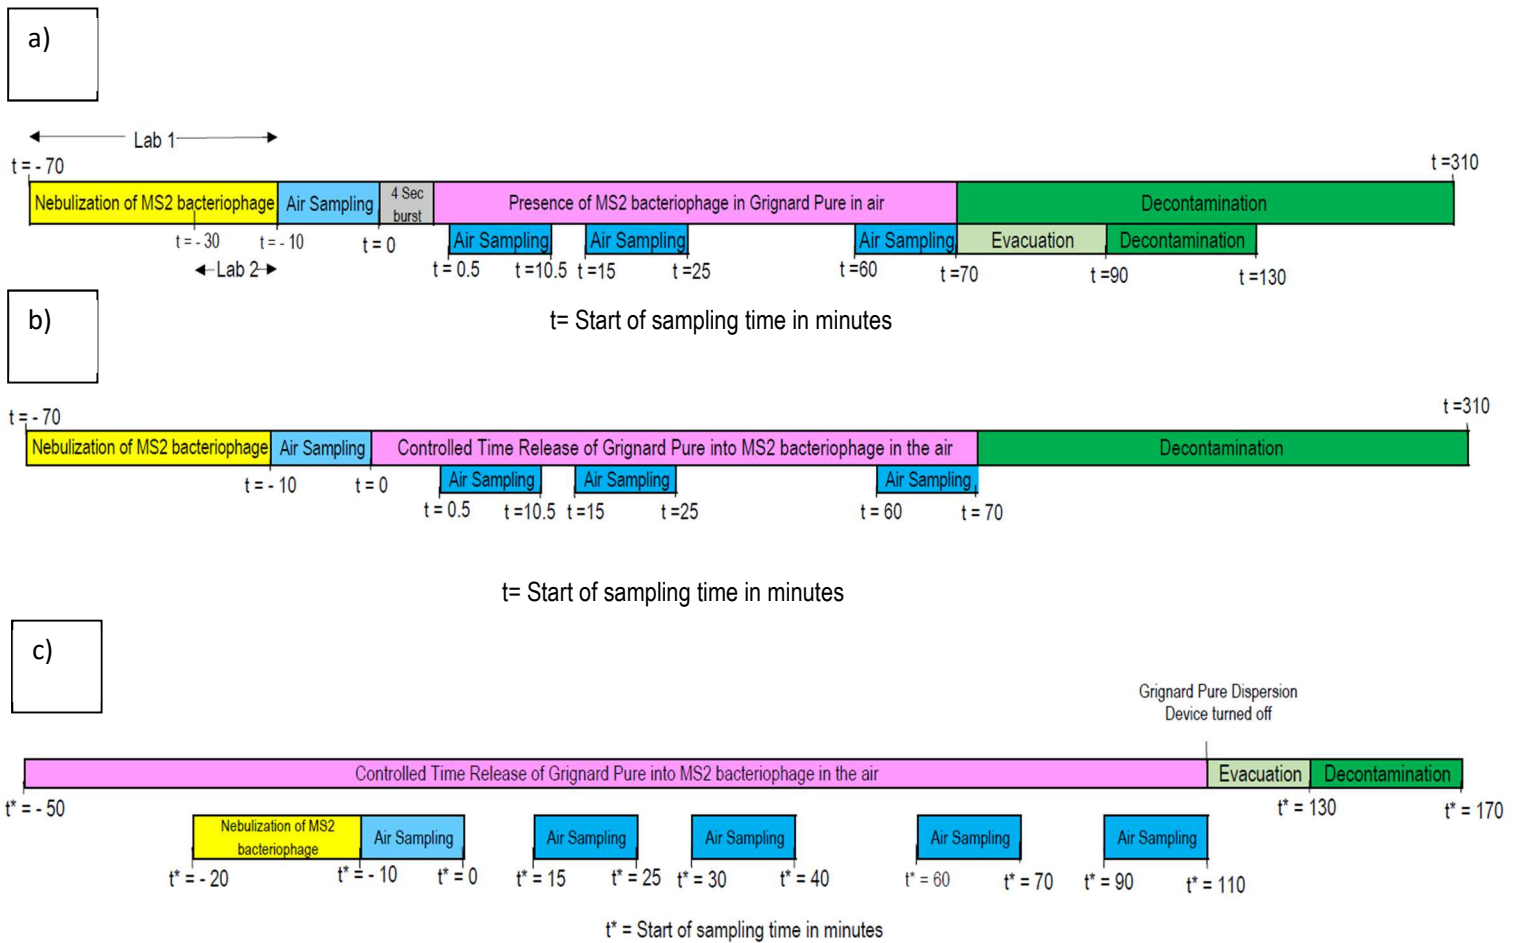

**Figure 1.** Timeline of experiments to investigate the efficacy of Grignard Pure™ (GP) against MS2 bacteriophage: a) timeline for 4-second burst testing of GP efficacy at Lab 1 and Lab 2. GP was released using Nimbus vaporizing device; b) timeline for controlled time release testing of GP efficacy in Lab 1. GP was released using Amhaze; c) timeline for controlled time release testing of GP efficacy in Lab 2. GP was released using either the Clarify or Aura. Here, MS2 was nebulized into airborne GP, and thus, to differentiate the time zero in these experiments from experiments in part b, time is denoted as “t\*.”

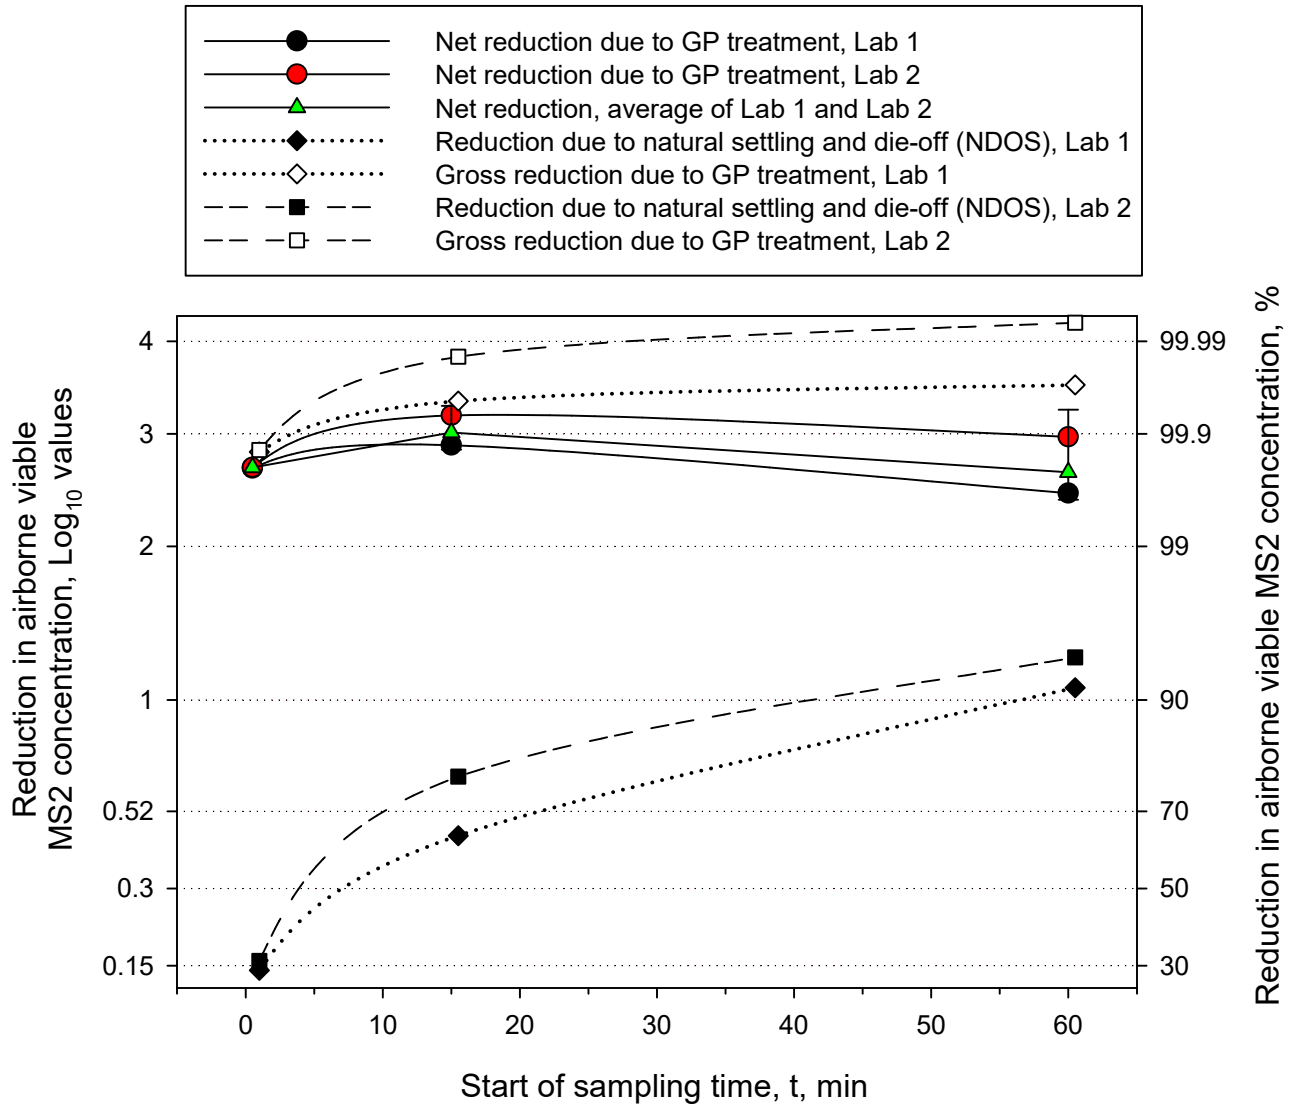

Figure 2. The log and percent reduction in viable airborne MS2 phage concentration at different sampling points when treated with a single 4-second burst of Grignard Pure™ aerosolizee by the Nimbus, a handheld vaporizing device. The experimental sequence in Lab 1 and Lab 2 was identical. In this experiment, MS2 was aerosolized first and then a 4-second burst of Grignard Pure™ was introduced. The airborne TEG concentration was not recorded.

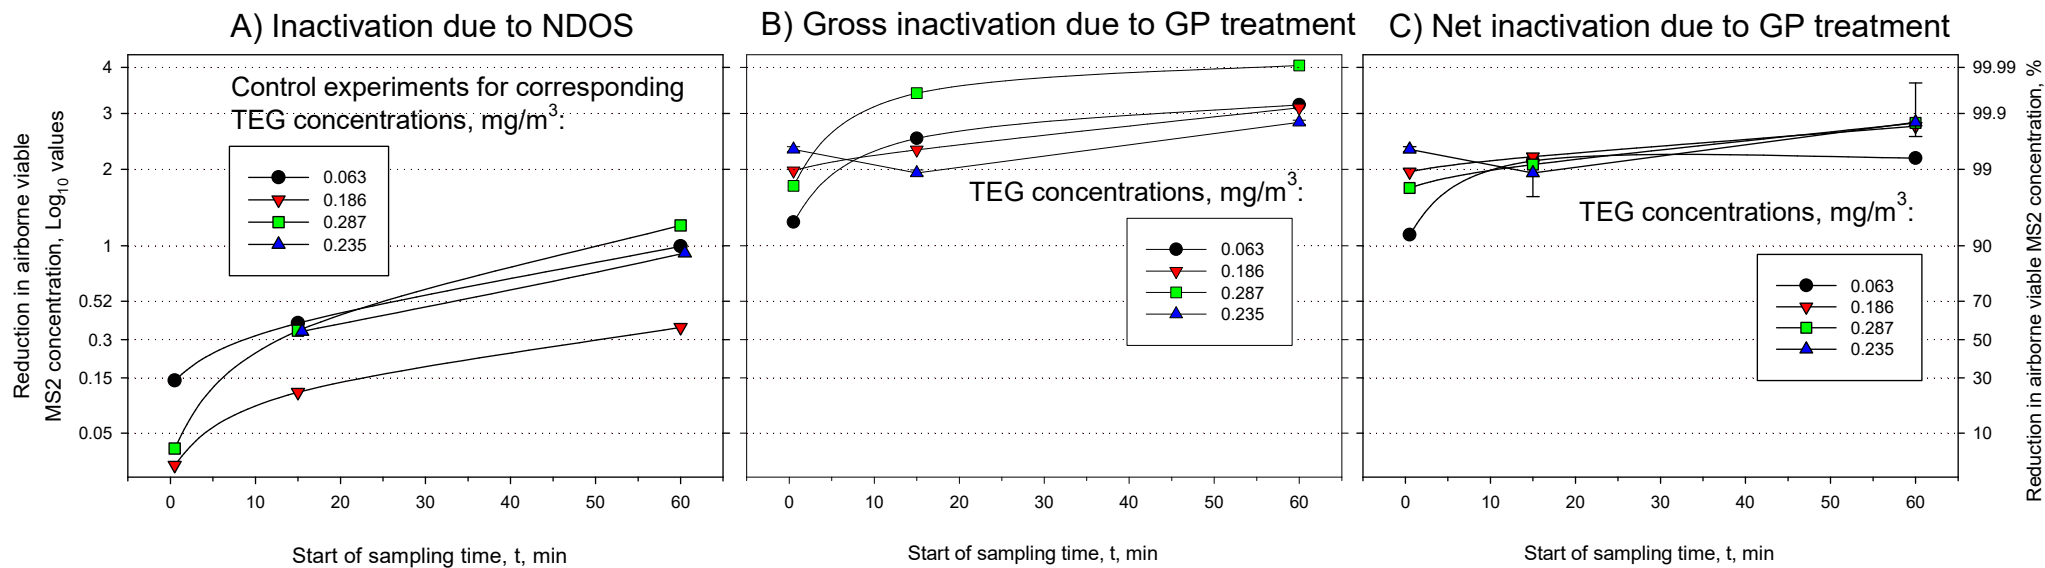

Figure 3. The log and percent reduction in viable MS2 concentration due to air treatment by different concentrations of Grignard Pure™ and the resulting TEG at different sampling points. In this experiment, MS2 was aerosolized first and then Grigard Pure™ was aerosolized into MS2 in a controlled time release mode using the Amhaze, a stand-alone vaporizing device.

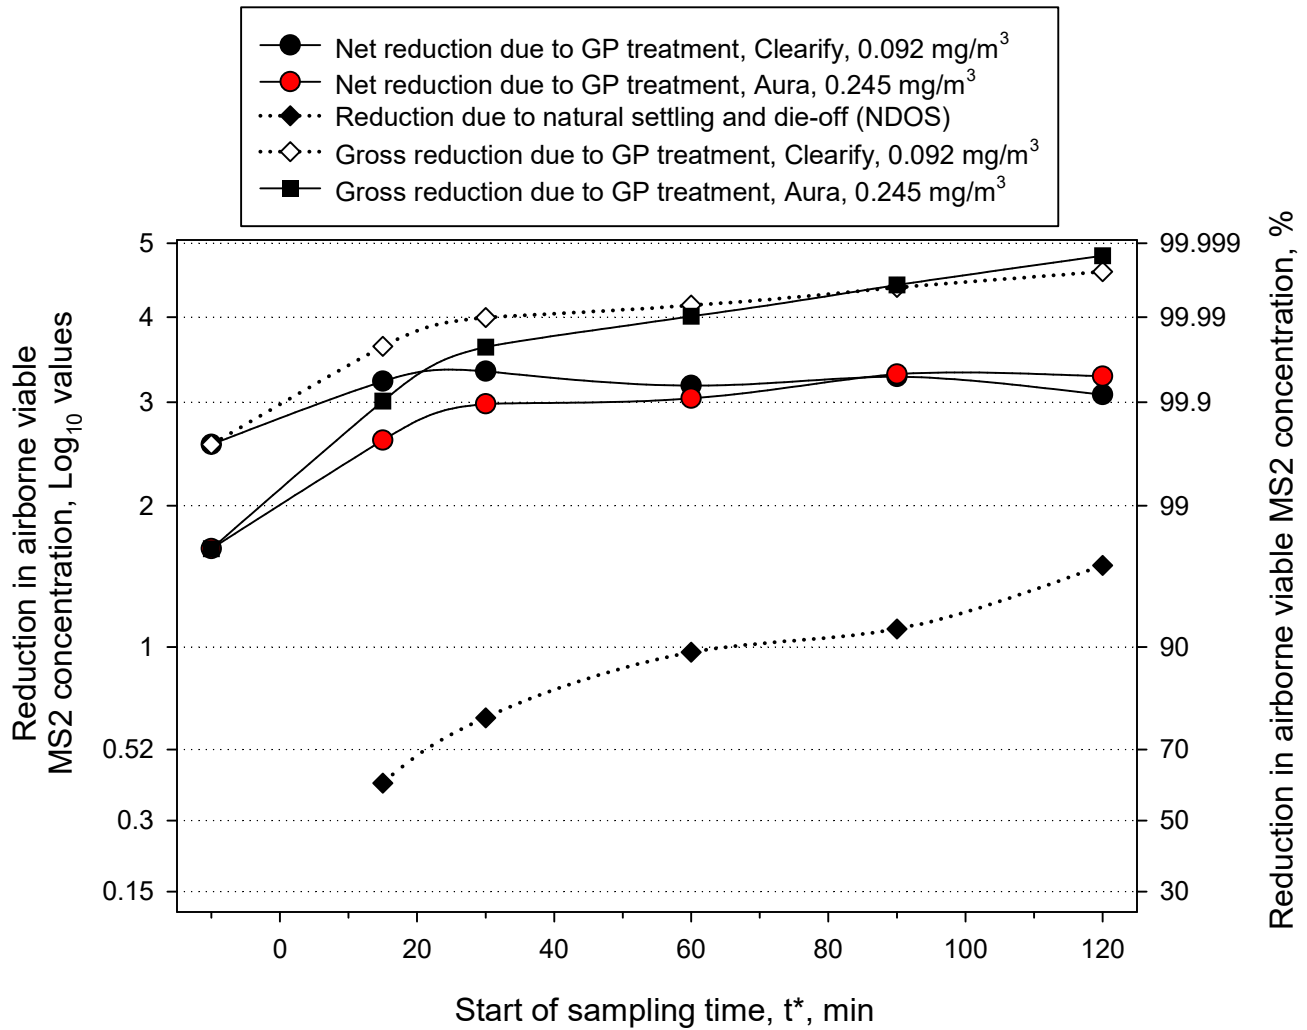

Figure 4. The log and percent reduction in the concentration of airborne viable MS2 bacteriophage at different sampling points when it was treated with a controlled time release of Grignard Pure™ using the Clearify Device, a stand-alone vaporizing device and the Aura, a stand-alone nebulizing device at Lab 2. In this experiment, MS2 was aerosolized into airborne Grignard Pure.
